# Supplementary material for: Raman spectroscopy-in situ characterization of reversibly intercalated oxygen vacancies in α-MoO3
Source: Royal Society of Chemistry journal article supplement (doi:10.1039/d0ra01207f), 2020-01-01
Supplement: d0ra01207f1.pdf [file d0ra01207f1.pdf]

1  
2  
3  
4  
5  
6  
7  
8  
9  
10  
11  
12  
13  
14  
15  
16  
17  
18

## Supporting Information

### **Raman spectroscopy-in situ characterization of reversibly intercalated oxygen vacancies in $\alpha$ -MoO<sub>3</sub>**

Isaías de Castro Silva, Alice Cosenza Reinaldo, Fernando Aparecido Sigoli and Italo Odone Mazali\*

Laboratory of Functional Materials– Institute of Chemistry, University of Campinas - UNICAMP, P.O. Box 6154, 13083-970, Campinas - SP, Brazil

Corresponding Author: \*mazali@unicamp.br

19 Table S1. Indexation of the diffraction peaks of the MoO<sub>3</sub> sample observed at 22 °C under  
 20 20 % O<sub>2</sub>/He, according to ICDD files 5-0508 ( $\alpha$ -MoO<sub>3</sub>) and 47-1320 ( $\beta$ -MoO<sub>3</sub>).

| <b>2<math>\theta</math> (°)</b> | <b>d<sub>hkl</sub> (Å)</b> | <b>Indexing</b>                                    |
|---------------------------------|----------------------------|----------------------------------------------------|
| 12.824                          | 6.94                       | (020) $\alpha$ -MoO <sub>3</sub>                   |
| 23.460                          | 3.81                       | (110) $\alpha$ -MoO <sub>3</sub>                   |
| 25.818                          | 3.47                       | (040) $\alpha$ -MoO <sub>3</sub>                   |
| 27.432                          | 3.268                      | (021) $\alpha$ -MoO <sub>3</sub>                   |
| 29.526                          | 3.041                      | (130) $\alpha$ -MoO <sub>3</sub>                   |
| 33.278                          | 2.706                      | (101) $\alpha$ -MoO <sub>3</sub>                   |
| 33.834                          | 2.663                      | (111) $\alpha$ -MoO <sub>3</sub>                   |
| 35.636                          | 2.532                      | (041) $\alpha$ -MoO <sub>3</sub>                   |
| 39.152                          | 2.313                      | (060) $\alpha$ -MoO <sub>3</sub>                   |
| 39.944                          | 2.269                      | (150) $\alpha$ -MoO <sub>3</sub>                   |
| 45.986                          | 1.984                      | (200) $\alpha$ -MoO <sub>3</sub>                   |
| 46.536                          | 1.962                      | (210) $\alpha$ -MoO <sub>3</sub>                   |
| <b>48.470</b>                   | <b>1.888</b>               | <b>(2 0 -2) <math>\beta</math>-MoO<sub>3</sub></b> |
| 49.470                          | 1.852                      | (002) $\alpha$ -MoO <sub>3</sub>                   |
| <b>51.332</b>                   | <b>1.789</b>               | <b>(021) <math>\beta</math>-MoO<sub>3</sub></b>    |
| 52.278                          | 1.759                      | (161) $\alpha$ -MoO <sub>3</sub>                   |
| <b>52.638</b>                   | <b>1.748</b>               | <b>(201) <math>\beta</math>-MoO<sub>3</sub></b>    |
| 53.070                          | 1.735                      | (211) $\alpha$ -MoO <sub>3</sub>                   |
| 54.018                          | 1.706                      | (221) $\alpha$ -MoO <sub>3</sub>                   |
| 55.446                          | 1.666                      | (112) $\alpha$ -MoO <sub>3</sub>                   |
| 56.630                          | 1.634                      | (042) $\alpha$ -MoO <sub>3</sub>                   |
| 57.906                          | 1.601                      | (171) $\alpha$ -MoO <sub>3</sub>                   |
| 59.124                          | 1.571                      | (081) $\alpha$ -MoO <sub>3</sub>                   |
| 64.830                          | 1.446                      | (062) $\alpha$ -MoO <sub>3</sub>                   |
| 65.210                          | 1.438                      | (190) $\alpha$ -MoO <sub>3</sub>                   |
| 67.908                          | 1.387                      | (0 10 0) $\alpha$ -MoO <sub>3</sub>                |
| 69.860                          | 1.353                      | (202) $\alpha$ -MoO <sub>3</sub>                   |

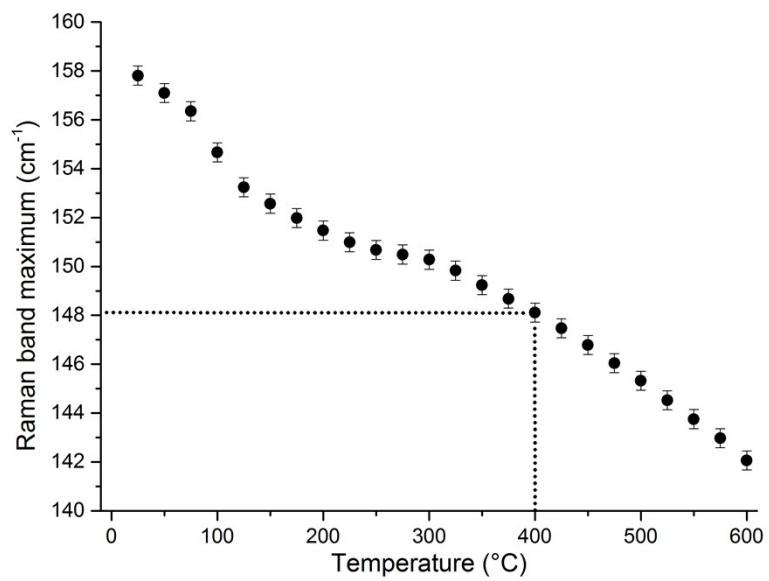

22

23 Figure S1.  $T_b$  Raman band frequency as a function of temperature for  $\alpha$ - $\text{MoO}_3$  under  $\text{O}_2$ .

24

25

26

27

28

29

30

31

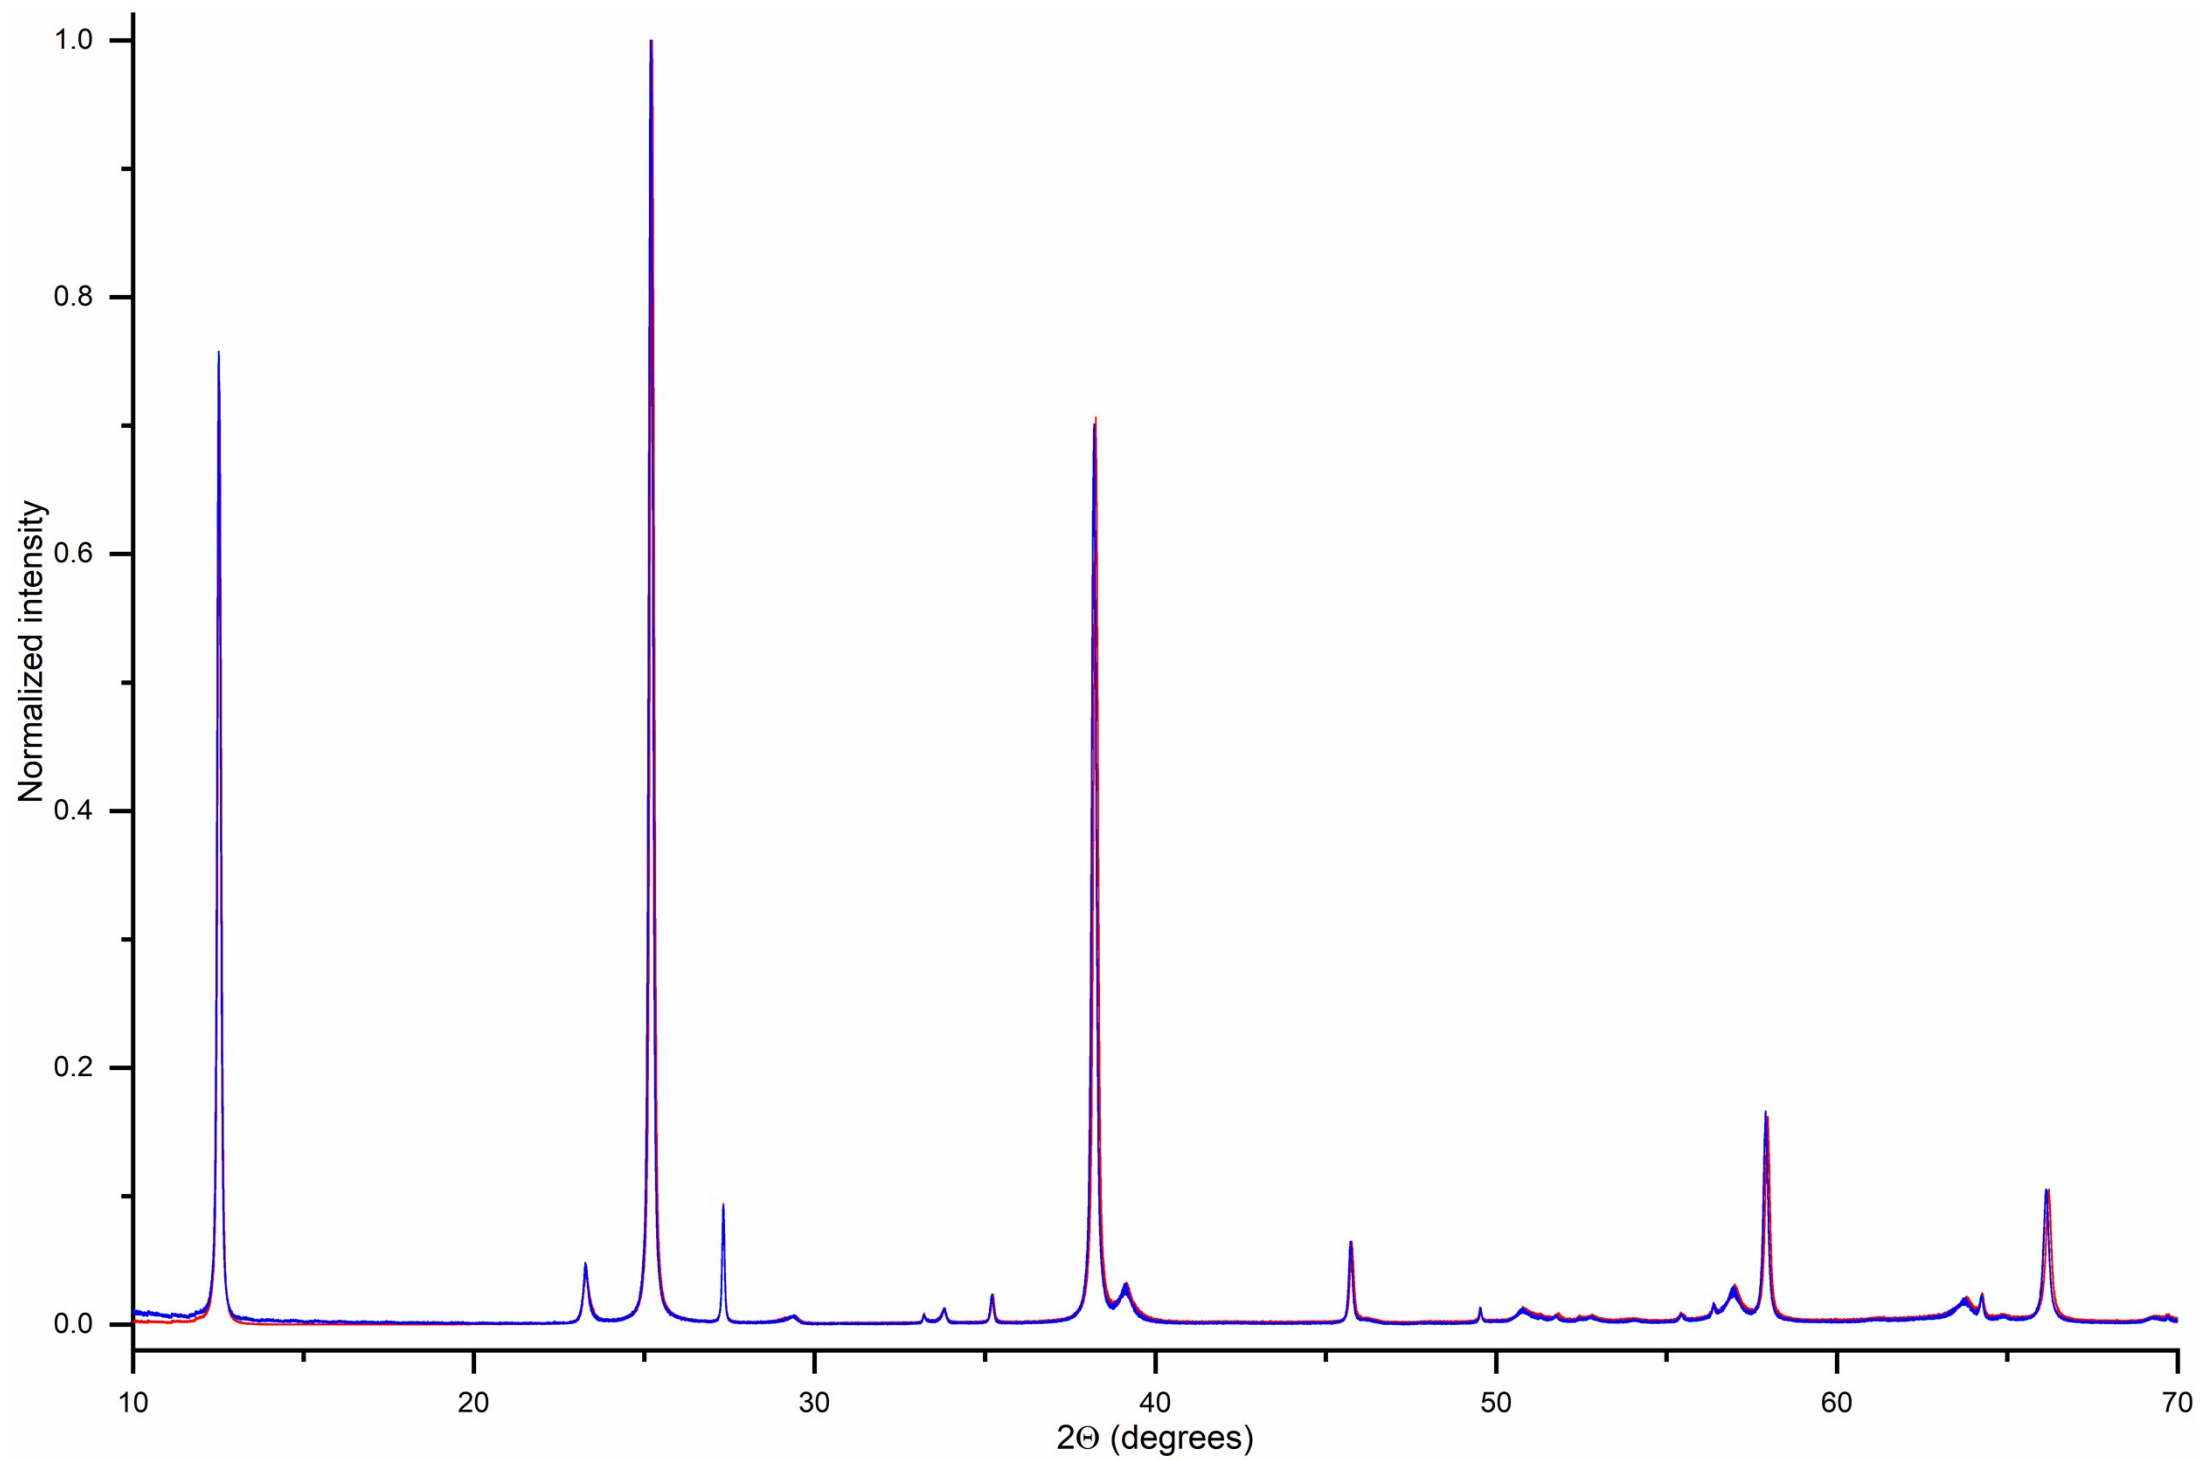

2  
3 Figure S2. Diffractograms of  $\text{MoO}_3$  sample obtained at  $400^\circ\text{C}$ . The blue ones were obtained after  $\text{O}_2$  exposure, and the red ones were obtained after  $\text{H}_2$  exposure.

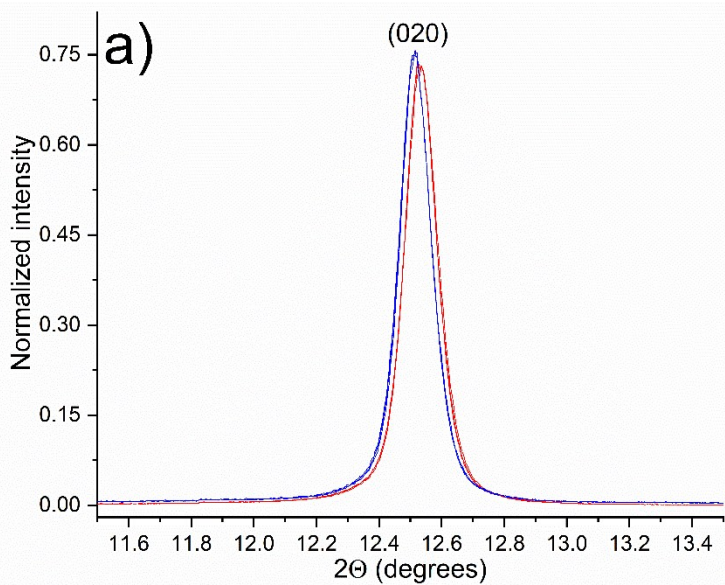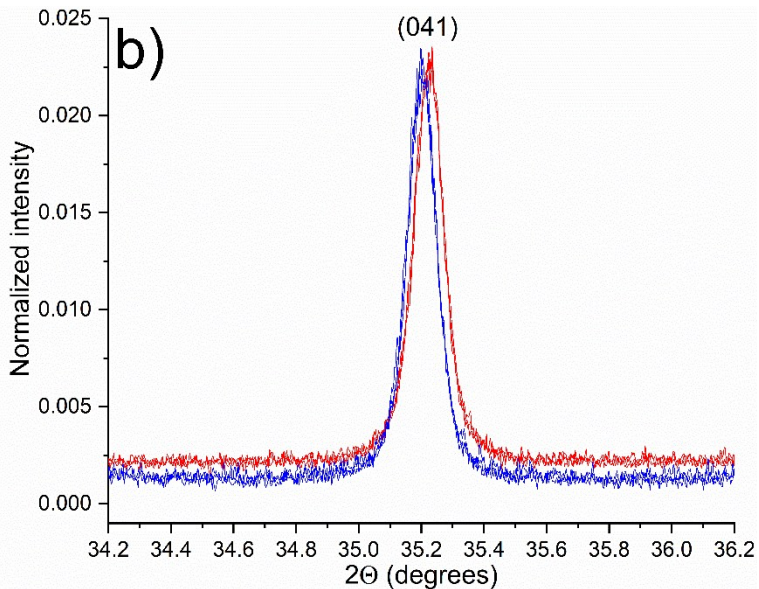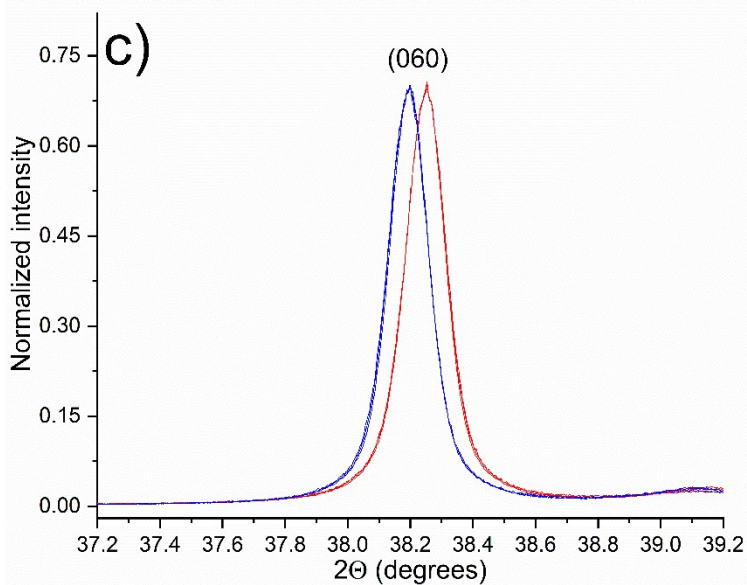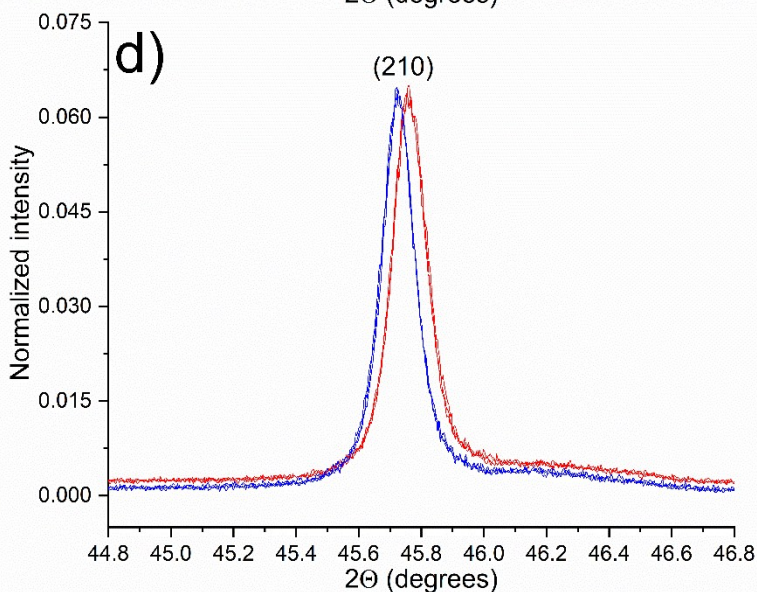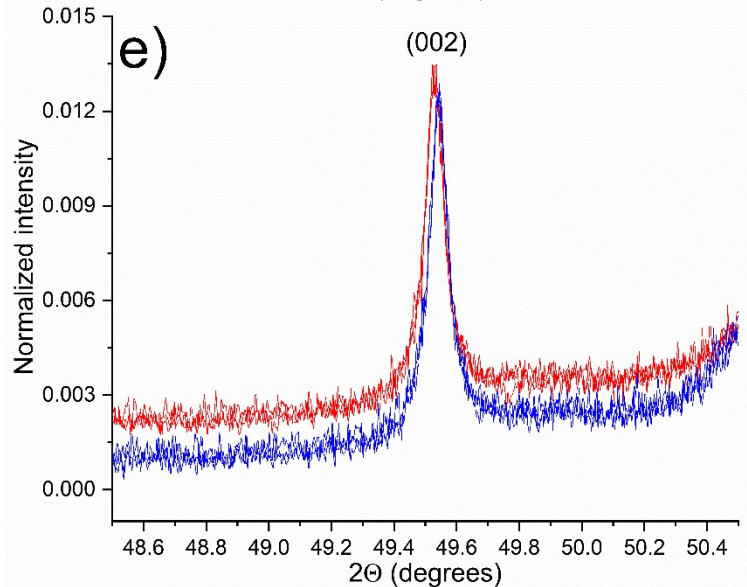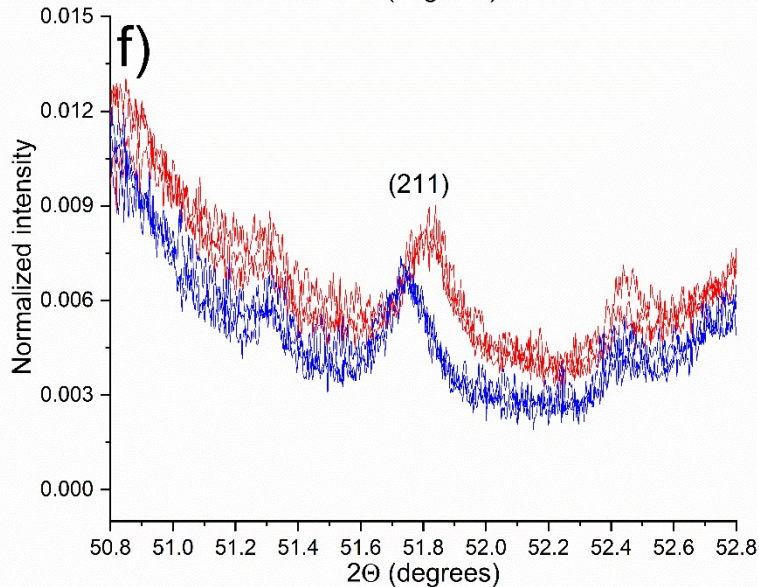

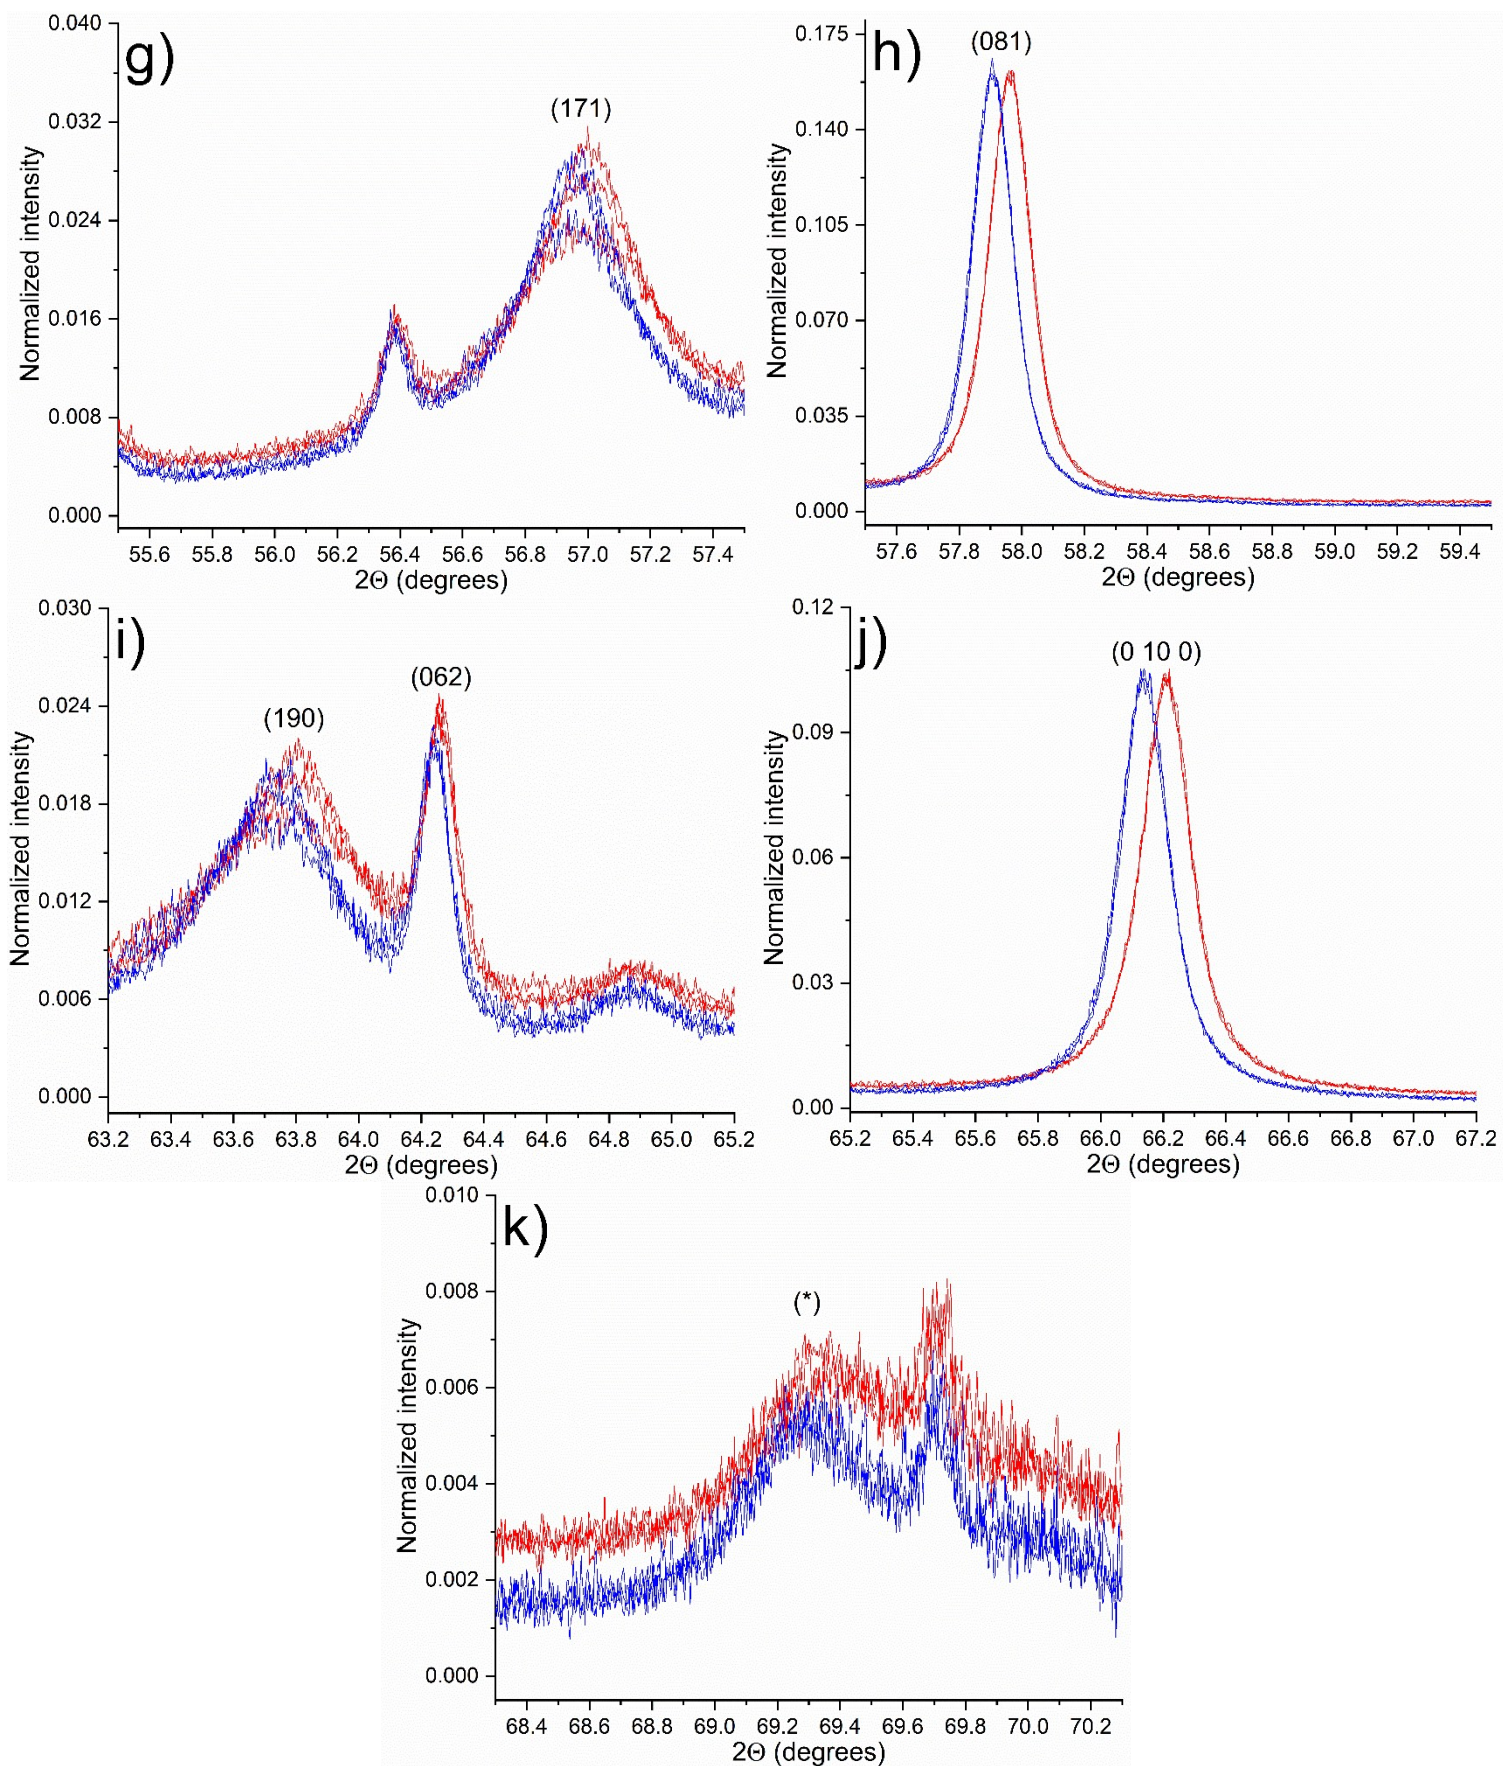

0 Figure S3. Amplification of diffractograms in Figure S2 to show peaks displacements. The blue ones were obtained  
 1 after  $O_2$  exposure, and the red ones were obtained after  $H_2$  exposure. The last peak could not be indexed (k).
